# Supplementary material
Source: PubMed Central journal article supplement (PMC3422211)
Supplement: NIHMS392106-supplement-Supplementary_Data.pdf [file NIHMS392106-supplement-Supplementary_Data.pdf]

|            |                                                                        |       |       |       |       |       |       |
|------------|------------------------------------------------------------------------|-------|-------|-------|-------|-------|-------|
|            | 10                                                                     | 20    | 30    | 40    | 50    | 60    | 70    |
|            | .....                                                                  | ..... | ..... | ..... | ..... | ..... | ..... |
| ZsGreen1   | ATGGCCCAGTCCAAGCACGGCCTGACCAAGGAGATGACCATGAAGTACCGCATGGAGGGCTGCGTGGACG |       |       |       |       |       |       |
| 01A_1.ab1  | .....                                                                  |       |       |       |       |       |       |
| 01B_2.ab1  | .....                                                                  |       |       |       |       |       |       |
| 01C_3.ab1  | .....                                                                  |       |       |       |       |       |       |
| 01D_4.ab1  | .....                                                                  |       |       |       |       |       |       |
| 01E_5.ab1  | .....                                                                  |       |       |       |       |       |       |
| 01F_6.ab1  | .....                                                                  |       |       |       |       |       |       |
| 01G_7.ab1  | .....A.....                                                            |       |       |       |       |       |       |
| 01H_8.ab1  | .....                                                                  |       |       |       |       |       |       |
| 02A_9.ab1  | .....                                                                  |       |       |       |       |       |       |
| 02B_10.ab1 | .....                                                                  |       |       |       |       |       |       |
| 02C_11.ab1 | .....                                                                  |       |       |       |       |       |       |
| 02D_12.ab1 | .....                                                                  |       |       |       |       |       |       |
| 02E_13.ab1 | .....G.....                                                            |       |       |       |       |       |       |
| 02F_14.ab1 | .....                                                                  |       |       |       |       |       |       |
| 02G_15.ab1 | .....                                                                  |       |       |       |       |       |       |
| 02H_16.ab1 | .....                                                                  |       |       |       |       |       |       |
| 03A_17.ab1 | .....                                                                  |       |       |       |       |       |       |
| 03B_18.ab1 | .....                                                                  |       |       |       |       |       |       |
| 03C_19.ab1 | .....                                                                  |       |       |       |       |       |       |
| 03D_20.ab1 | .....                                                                  |       |       |       |       |       |       |
| 03E_21.ab1 | .....                                                                  |       |       |       |       |       |       |
| 03F_22.ab1 | .....G.....                                                            |       |       |       |       |       |       |
| 03G_23.ab1 | .....G.....                                                            |       |       |       |       |       |       |
| 03H_24.ab1 | .....                                                                  |       |       |       |       |       |       |
| 04A_25.ab1 | .....                                                                  |       |       |       |       |       |       |

|            |                                                                        |       |       |       |       |       |       |
|------------|------------------------------------------------------------------------|-------|-------|-------|-------|-------|-------|
|            | 80                                                                     | 90    | 100   | 110   | 120   | 130   | 140   |
|            | .....                                                                  | ..... | ..... | ..... | ..... | ..... | ..... |
| ZsGreen1   | GCCACAAGTTCGTGATCACCGGCAGGGGCATCGGCTACCCCTTCAAGGGCAAGCAGGCCATCAACCTGTG |       |       |       |       |       |       |
| 01A_1.ab1  | .....                                                                  |       |       |       |       |       |       |
| 01B_2.ab1  | .....                                                                  |       |       |       |       |       |       |
| 01C_3.ab1  | .....                                                                  |       |       |       |       |       |       |
| 01D_4.ab1  | .....                                                                  |       |       |       |       |       |       |
| 01E_5.ab1  | .....G.....                                                            |       |       |       |       |       |       |
| 01F_6.ab1  | .....                                                                  |       |       |       |       |       |       |
| 01G_7.ab1  | .....                                                                  |       |       |       |       |       |       |
| 01H_8.ab1  | .....                                                                  |       |       |       |       |       |       |
| 02A_9.ab1  | .....                                                                  |       |       |       |       |       |       |
| 02B_10.ab1 | .....                                                                  |       |       |       |       |       |       |
| 02C_11.ab1 | .....                                                                  |       |       |       |       |       |       |
| 02D_12.ab1 | .....                                                                  |       |       |       |       |       |       |
| 02E_13.ab1 | .....                                                                  |       |       |       |       |       |       |
| 02F_14.ab1 | .....                                                                  |       |       |       |       |       |       |
| 02G_15.ab1 | .....                                                                  |       |       |       |       |       |       |
| 02H_16.ab1 | .....                                                                  |       |       |       |       |       |       |
| 03A_17.ab1 | .....                                                                  |       |       |       |       |       |       |
| 03B_18.ab1 | .....                                                                  |       |       |       |       |       |       |
| 03C_19.ab1 | .....                                                                  |       |       |       |       |       |       |
| 03D_20.ab1 | .....                                                                  |       |       |       |       |       |       |
| 03E_21.ab1 | .....                                                                  |       |       |       |       |       |       |
| 03F_22.ab1 | .....                                                                  |       |       |       |       |       |       |
| 03G_23.ab1 | .....                                                                  |       |       |       |       |       |       |
| 03H_24.ab1 | .....                                                                  |       |       |       |       |       |       |
| 04A_25.ab1 | .....                                                                  |       |       |       |       |       |       |

|            |              |                                                           |       |        |       |       |        |
|------------|--------------|-----------------------------------------------------------|-------|--------|-------|-------|--------|
|            | 150          | 160                                                       | 170   | 180    | 190   | 200   | 210    |
|            | .....        | .....                                                     | ..... | .....  | ..... | ..... | .....  |
| ZsGreen1   | CGTGGTGGAGGG | CGGCCCTTGCCCTTCGCCGAGGACATCTTGTCGCCCGCCTTCATGTACGGCAACCGC |       |        |       |       |        |
| 01A_1.ab1  | .....        | .....                                                     | ..... | .....  | ..... | ..... | .....  |
| 01B_2.ab1  | .....        | .....                                                     | ..... | .....  | ..... | ..... | .....  |
| 01C_3.ab1  | .....        | .....                                                     | ..... | .....  | ..... | ..... | .....  |
| 01D_4.ab1  | .....        | .....                                                     | ..... | .....  | ..... | ..... | .....  |
| 01E_5.ab1  | .....        | .....                                                     | ..... | .....  | ..... | ..... | .....  |
| 01F_6.ab1  | .....        | .....                                                     | ..... | .....  | ..... | ..... | .....  |
| 01G_7.ab1  | .....        | .....                                                     | ..... | .....  | ..... | ..... | .....  |
| 01H_8.ab1  | .....        | .....                                                     | ..... | .....  | ..... | ..... | .....  |
| 02A_9.ab1  | .....        | .....                                                     | ..... | .....  | ..... | ..... | .....  |
| 02B_10.ab1 | .....        | .....                                                     | ..... | .....  | ..... | ..... | .....  |
| 02C_11.ab1 | .....        | .....                                                     | ..... | .....  | ..... | ..... | .....  |
| 02D_12.ab1 | .....        | .....                                                     | ..... | .....  | ..... | ..... | .....  |
| 02E_13.ab1 | .....        | .....                                                     | ..... | .....  | ..... | ..... | .....  |
| 02F_14.ab1 | .....        | .....                                                     | ..... | .....  | ..... | ..... | .....  |
| 02G_15.ab1 | .....        | .....                                                     | ..... | .....  | ..... | ..... | .....  |
| 02H_16.ab1 | .....        | .....                                                     | ..... | .....  | ..... | ..... | .....  |
| 03A_17.ab1 | .....        | .....                                                     | ..... | .....  | ..... | ..... | .....A |
| 03B_18.ab1 | .....        | .....                                                     | ..... | .....  | ..... | ..... | .....  |
| 03C_19.ab1 | .....        | .....                                                     | ..... | .....  | ..... | ..... | .....  |
| 03D_20.ab1 | .....        | .....                                                     | ..... | .....  | ..... | ..... | .....  |
| 03E_21.ab1 | .....        | .....                                                     | ..... | .....C | ..... | ..... | .....  |
| 03F_22.ab1 | .....        | .....                                                     | ..... | .....  | ..... | ..... | .....  |
| 03G_23.ab1 | .....        | .....                                                     | ..... | .....  | ..... | ..... | .....  |
| 03H_24.ab1 | .....        | .....                                                     | ..... | .....  | ..... | ..... | .....  |
| 04A_25.ab1 | .....        | .....                                                     | ..... | .....  | ..... | ..... | .....  |

|            |                                                |       |                       |       |        |       |       |
|------------|------------------------------------------------|-------|-----------------------|-------|--------|-------|-------|
|            | 220                                            | 230   | 240                   | 250   | 260    | 270   | 280   |
|            | .....                                          | ..... | .....                 | ..... | .....  | ..... | ..... |
| ZsGreen1   | GTGTTCAACCGAGTACCCCCAGGACATCGTCGACTACTTCAAGAAC | TCC   | TGCCCGCCGGCTACACCTGGG |       |        |       |       |
| 01A_1.ab1  | .....                                          | ..... | .....                 | ..... | .....  | ..... | ..... |
| 01B_2.ab1  | .....                                          | ..... | .....                 | ..... | .....  | ..... | ..... |
| 01C_3.ab1  | .....                                          | ..... | .....                 | ..... | .....  | ..... | ..... |
| 01D_4.ab1  | .....                                          | ..... | .....                 | ..... | .....  | ..... | ..... |
| 01E_5.ab1  | .....                                          | ..... | .....                 | ..... | .....  | ..... | ..... |
| 01F_6.ab1  | .....                                          | ..... | .....                 | ..... | .....  | ..... | ..... |
| 01G_7.ab1  | .....                                          | ..... | .....                 | ..... | .....  | ..... | ..... |
| 01H_8.ab1  | .....                                          | ..... | .....                 | ..... | .....  | ..... | ..... |
| 02A_9.ab1  | .....                                          | ..... | .....                 | ..... | .....  | ..... | ..... |
| 02B_10.ab1 | .....                                          | ..... | .....                 | ..... | .....  | ..... | ..... |
| 02C_11.ab1 | .....                                          | ..... | .....                 | ..... | .....  | ..... | ..... |
| 02D_12.ab1 | .....                                          | ..... | .....                 | ..... | .....  | ..... | ..... |
| 02E_13.ab1 | .....                                          | ..... | .....                 | ..... | .....  | ..... | ..... |
| 02F_14.ab1 | .....                                          | ..... | .....                 | ..... | .....  | ..... | ..... |
| 02G_15.ab1 | .....                                          | ..... | .....                 | ..... | .....  | ..... | ..... |
| 02H_16.ab1 | .....                                          | ..... | .....                 | ..... | .....  | ..... | ..... |
| 03A_17.ab1 | .....                                          | ..... | .....                 | ..... | .....  | ..... | ..... |
| 03B_18.ab1 | .....                                          | ..... | .....                 | ..... | .....T | ..... | ..... |
| 03C_19.ab1 | .....                                          | ..... | .....                 | ..... | .....T | ..... | ..... |
| 03D_20.ab1 | .....                                          | ..... | .....                 | ..... | .....  | ..... | ..... |
| 03E_21.ab1 | .....                                          | ..... | .....                 | ..... | .....  | ..... | ..... |
| 03F_22.ab1 | .....                                          | ..... | .....                 | ..... | .....  | ..... | ..... |
| 03G_23.ab1 | .....                                          | ..... | .....                 | ..... | .....  | ..... | ..... |
| 03H_24.ab1 | .....                                          | ..... | .....                 | ..... | .....  | ..... | ..... |
| 04A_25.ab1 | .....                                          | ..... | .....                 | ..... | .....  | ..... | ..... |





|            |                                                                                     |              |               |                    |                     |       |       |
|------------|-------------------------------------------------------------------------------------|--------------|---------------|--------------------|---------------------|-------|-------|
|            | 570                                                                                 | 580          | 590           | 600                | 610                 | 620   | 630   |
|            | ..... ..... ..... ..... ..... ..... ..... ..... ..... ..... ..... ..... ..... ..... |              |               |                    |                     |       |       |
| ZsGreen1   | CAAGTCCG                                                                            | TGCCCGCAAGAT | TGCCGACTGGCAC | TTTCATCCAGCACAAGCT | GACCCGCGAGGACCGCAGC |       |       |
| 01A_1.ab1  | .....                                                                               | .....        | .....         | .....              | .....               | ..... | ..... |
| 01B_2.ab1  | .....                                                                               | .....        | .....         | .....              | .....               | ..... | ..... |
| 01C_3.ab1  | .....                                                                               | .....        | .....A.....   | .....              | .....               | ..... | ..... |
| 01D_4.ab1  | .....                                                                               | .....        | .....         | .....              | .....               | ..... | ..... |
| 01E_5.ab1  | .....                                                                               | .....        | .....         | .....              | .....               | ..... | ..... |
| 01F_6.ab1  | .....                                                                               | .....        | .....         | .....              | .....               | ..... | ..... |
| 01G_7.ab1  | .....                                                                               | .....        | .....         | .....              | .....               | ..... | ..... |
| 01H_8.ab1  | .....                                                                               | .....        | .....         | .....              | .....G.....         | ..... | ..... |
| 02A_9.ab1  | .....                                                                               | .....        | .....         | .....              | .....               | ..... | ..... |
| 02B_10.ab1 | .....                                                                               | .....        | .....T.....   | .....              | .....               | ..... | ..... |
| 02C_11.ab1 | .....                                                                               | .....        | .....         | .....              | .....               | ..... | ..... |
| 02D_12.ab1 | .....                                                                               | .....        | .....         | .....              | .....               | ..... | ..... |
| 02E_13.ab1 | .....                                                                               | .....        | .....         | .....              | .....               | ..... | ..... |
| 02F_14.ab1 | .....                                                                               | .....        | .....         | .....              | .....               | ..... | ..... |
| 02G_15.ab1 | .....                                                                               | .....        | .....         | .....              | .....               | ..... | ..... |
| 02H_16.ab1 | .....                                                                               | .....        | .....         | .....              | .....               | ..... | ..... |
| 03A_17.ab1 | .....                                                                               | .....        | .....         | .....              | .....               | ..... | ..... |
| 03B_18.ab1 | .....                                                                               | .....        | .....         | .....              | .....               | ..... | ..... |
| 03C_19.ab1 | .....                                                                               | .....        | .....         | .....              | .....               | ..... | ..... |
| 03D_20.ab1 | .....                                                                               | .....        | .....         | .....              | .....               | ..... | ..... |
| 03E_21.ab1 | .....                                                                               | .....        | .....         | .....              | .....               | ..... | ..... |
| 03F_22.ab1 | .....                                                                               | .....        | .....         | .....              | .....               | ..... | ..... |
| 03G_23.ab1 | .....                                                                               | .....        | .....         | .....              | .....               | ..... | ..... |
| 03H_24.ab1 | .....                                                                               | .....        | .....         | .....              | .....               | ..... | ..... |
| 04A_25.ab1 | .....                                                                               | .....        | .....         | .....              | .....               | ..... | ..... |

|            |                                                                               |       |       |             |       |       |       |
|------------|-------------------------------------------------------------------------------|-------|-------|-------------|-------|-------|-------|
|            | 640                                                                           | 650   | 660   | 670         | 680   | 690   | 700   |
|            | ..... ..... ..... ..... ..... ..... ..... ..... ..... ..... ..... ..... ..... |       |       |             |       |       |       |
| ZsGreen1   | GACGCCAAGAACCAGAAAGTGGCACCTGACCGAGCACGCCATCGCCTCCGGCTCCGCCTTGCCCCATCATC       |       |       |             |       |       |       |
| 01A_1.ab1  | .....                                                                         | ..... | ..... | .....       | ..... | ..... | ..... |
| 01B_2.ab1  | .....                                                                         | ..... | ..... | .....       | ..... | ..... | ..... |
| 01C_3.ab1  | .....                                                                         | ..... | ..... | .....       | ..... | ..... | ..... |
| 01D_4.ab1  | .....                                                                         | ..... | ..... | .....       | ..... | ..... | ..... |
| 01E_5.ab1  | .....                                                                         | ..... | ..... | .....       | ..... | ..... | ..... |
| 01F_6.ab1  | .....                                                                         | ..... | ..... | .....       | ..... | ..... | ..... |
| 01G_7.ab1  | .....                                                                         | ..... | ..... | .....       | ..... | ..... | ..... |
| 01H_8.ab1  | .....                                                                         | ..... | ..... | .....       | ..... | ..... | ..... |
| 02A_9.ab1  | .....                                                                         | ..... | ..... | .....       | ..... | ..... | ..... |
| 02B_10.ab1 | .....                                                                         | ..... | ..... | .....       | ..... | ..... | ..... |
| 02C_11.ab1 | .....                                                                         | ..... | ..... | .....       | ..... | ..... | ..... |
| 02D_12.ab1 | .....                                                                         | ..... | ..... | .....       | ..... | ..... | ..... |
| 02E_13.ab1 | .....                                                                         | ..... | ..... | .....       | ..... | ..... | ..... |
| 02F_14.ab1 | .....                                                                         | ..... | ..... | .....T..... | ..... | ..... | ..... |
| 02G_15.ab1 | .....                                                                         | ..... | ..... | .....       | ..... | ..... | ..... |
| 02H_16.ab1 | .....                                                                         | ..... | ..... | .....       | ..... | ..... | ..... |
| 03A_17.ab1 | .....                                                                         | ..... | ..... | .....       | ..... | ..... | ..... |
| 03B_18.ab1 | .....                                                                         | ..... | ..... | .....       | ..... | ..... | ..... |
| 03C_19.ab1 | .....                                                                         | ..... | ..... | .....       | ..... | ..... | ..... |
| 03D_20.ab1 | .....                                                                         | ..... | ..... | .....       | ..... | ..... | ..... |
| 03E_21.ab1 | .....                                                                         | ..... | ..... | .....       | ..... | ..... | ..... |
| 03F_22.ab1 | .....                                                                         | ..... | ..... | .....       | ..... | ..... | ..... |
| 03G_23.ab1 | .....                                                                         | ..... | ..... | .....       | ..... | ..... | ..... |
| 03H_24.ab1 | .....                                                                         | ..... | ..... | .....       | ..... | ..... | ..... |
| 04A_25.ab1 | .....                                                                         | ..... | ..... | .....       | ..... | ..... | ..... |

710

.....|.....|.....

|            |                      |
|------------|----------------------|
| ZsGreen1   | <u>ACCATCACCCTAG</u> |
| 01A_1.ab1  | .....                |
| 01B_2.ab1  | .....                |
| 01C_3.ab1  | .....                |
| 01D_4.ab1  | .....                |
| 01E_5.ab1  | .....                |
| 01F_6.ab1  | .....                |
| 01G_7.ab1  | .....                |
| 01H_8.ab1  | .....                |
| 02A_9.ab1  | .....                |
| 02B_10.ab1 | .....                |
| 02C_11.ab1 | .....                |
| 02D_12.ab1 | .....                |
| 02E_13.ab1 | .....                |
| 02F_14.ab1 | .....                |
| 02G_15.ab1 | .....                |
| 02H_16.ab1 | .....                |
| 03A_17.ab1 | .....                |
| 03B_18.ab1 | .....                |
| 03C_19.ab1 | .....                |
| 03D_20.ab1 | .....                |
| 03E_21.ab1 | .....                |
| 03F_22.ab1 | .....                |
| 03G_23.ab1 | .....                |
| 03H_24.ab1 | .....                |
| 04A_25.ab1 | .....                |

10 20 30 40 50 60 70

ZsGreen1 ATGGCCCAGTCCAAGCACGGCC TGACCAAGGAGATGACCATGAAGTACCGCATGGAGGGCTGCGTGGACG

04B\_26.ab1  
 04C\_27.ab1  
 04D\_28.ab1  
 04E\_29.ab1  
 04F\_30.ab1  
 04G\_31.ab1  
 04H\_32.ab1  
 05A\_33.ab1  
 05B\_34.ab1  
 05C\_35.ab1  
 05D\_36.ab1  
 05E\_37.ab1  
 05F\_38.ab1  
 05G\_39.ab1  
 05H\_40.ab1  
 06A\_41.ab1  
 06B\_42.ab1  
 06C\_43.ab1  
 06D\_44.ab1  
 06E\_45.ab1  
 06F\_46.ab1  
 06G\_47.ab1  
 06H\_48.ab1  
 07A\_49.ab1  
 07B\_50.ab1  
 07C\_51.ab1

80 90 100 110 120 130 140

ZsGreen1 GCCACAAGTTCGTGATCACCGGCAGGGGCATCGGCTACCCCTTCAAGGGCAAGCAGGCCATCAACCTGTG

04B\_26.ab1  
 04C\_27.ab1  
 04D\_28.ab1  
 04E\_29.ab1  
 04F\_30.ab1  
 04G\_31.ab1  
 04H\_32.ab1  
 05A\_33.ab1  
 05B\_34.ab1  
 05C\_35.ab1  
 05D\_36.ab1  
 05E\_37.ab1  
 05F\_38.ab1  
 05G\_39.ab1  
 05H\_40.ab1  
 06A\_41.ab1  
 06B\_42.ab1  
 06C\_43.ab1  
 06D\_44.ab1  
 06E\_45.ab1  
 06F\_46.ab1  
 06G\_47.ab1  
 06H\_48.ab1  
 07A\_49.ab1  
 07B\_50.ab1  
 07C\_51.ab1







430          440          450          460          470          480          490

.....|.....|.....|.....|.....|.....|.....|.....|.....|.....|.....|.....|.....|.....|

ZsGreen1     GATGACCCGACAAC**T**GGGAGCCCTCCTGCGAGAAGATC**A**TCCCCG**T**GCCCAAGCAGGGC**A**TCTTGAAGGGC

04B\_26.ab1    .....

04C\_27.ab1    .....

04D\_28.ab1    .....

04E\_29.ab1    .....

04F\_30.ab1    .....

04G\_31.ab1    .....

04H\_32.ab1    .....

05A\_33.ab1    .....

05B\_34.ab1    .....

05C\_35.ab1    .....

05D\_36.ab1    .....

05E\_37.ab1    .....

05F\_38.ab1    .....

05G\_39.ab1    .....G.....

05H\_40.ab1    .....

06A\_41.ab1    .....

06B\_42.ab1    .....

06C\_43.ab1    .....

06D\_44.ab1    .....

06E\_45.ab1    .....

06F\_46.ab1    .....

06G\_47.ab1    .....

06H\_48.ab1    .....

07A\_49.ab1    .....

07B\_50.ab1    .....

07C\_51.ab1    .....G.....

500          510          520          530          540          550          560

.....|.....|.....|.....|.....|.....|.....|.....|.....|.....|.....|.....|.....|

ZsGreen1     GACCGT**G**AGC**A**T**G**TACCTGCTGCTGAAGGACGGTGGCCGCTTGCGCTG**C**AGTTCGACACCGTGTACAAGG

04B\_26.ab1    .....

04C\_27.ab1    .....

04D\_28.ab1    .....

04E\_29.ab1    .....

04F\_30.ab1    .....

04G\_31.ab1    .....

04H\_32.ab1    .....

05A\_33.ab1    .....

05B\_34.ab1    .....

05C\_35.ab1    .....

05D\_36.ab1    .....

05E\_37.ab1    .....

05F\_38.ab1    .....

05G\_39.ab1    .....

05H\_40.ab1    .....

06A\_41.ab1    .....

06B\_42.ab1    .....

06C\_43.ab1    .....

06D\_44.ab1    .....

06E\_45.ab1    .....

06F\_46.ab1    .....

06G\_47.ab1    .....

06H\_48.ab1    .....

07A\_49.ab1    .....

07B\_50.ab1    .....

07C\_51.ab1    .....A.....

|            |                                                                          |       |       |       |       |       |       |
|------------|--------------------------------------------------------------------------|-------|-------|-------|-------|-------|-------|
|            | 570                                                                      | 580   | 590   | 600   | 610   | 620   | 630   |
| ZsGreen1   | .... .... .... .... .... .... .... .... .... .... .... .... ....         |       |       |       |       |       |       |
|            | CCAAGTCCGTGCCCCGCAAGATGCCCGACTGGCAC TTCATCCAGCACAAAGCTGACCCGCGAGGACCGCAG |       |       |       |       |       |       |
| 04B_26.ab1 | .....                                                                    | ..... | ..... | ..... | ..... | ..... | ..... |
| 04C_27.ab1 | .....                                                                    | ..... | ..... | ..... | ..... | ..... | ..... |
| 04D_28.ab1 | .....                                                                    | ..... | ..... | ..... | ..... | ..... | ..... |
| 04E_29.ab1 | .....                                                                    | ..... | ..... | ..... | ..... | ..... | ..... |
| 04F_30.ab1 | .....                                                                    | ..... | ..... | ..... | ..... | ..... | ..... |
| 04G_31.ab1 | .....                                                                    | ..... | ..... | ..... | ..... | ..... | ..... |
| 04H_32.ab1 | .....                                                                    | ..... | ..... | ..... | ..... | ..... | ..... |
| 05A_33.ab1 | .....                                                                    | ..... | ..... | ..... | ..... | ..... | ..... |
| 05B_34.ab1 | .....                                                                    | ..... | ..... | ..... | ..... | ..... | ..... |
| 05C_35.ab1 | .....                                                                    | ..... | ..... | ..... | ..... | ..... | ..... |
| 05D_36.ab1 | .....                                                                    | ..... | ..... | ..... | ..... | ..... | ..... |
| 05E_37.ab1 | .....                                                                    | ..... | ..... | ..... | ..... | ..... | ..... |
| 05F_38.ab1 | .....                                                                    | ..... | ..... | ..... | ..... | ..... | ..... |
| 05G_39.ab1 | .....                                                                    | ..... | ..... | ..... | ..... | ..... | ..... |
| 05H_40.ab1 | .....                                                                    | ..... | ..... | ..... | ..... | ..... | ..... |
| 06A_41.ab1 | .....                                                                    | ..... | ..... | ..... | ..... | ..... | ..... |
| 06B_42.ab1 | .....                                                                    | ..... | ..... | ..... | ..... | ..... | ..... |
| 06C_43.ab1 | .....                                                                    | ..... | ..... | ..... | ..... | ..... | ..... |
| 06D_44.ab1 | .....                                                                    | ..... | ..... | ..... | ..... | ..... | ..... |
| 06E_45.ab1 | .....                                                                    | ..... | ..... | ..... | ..... | ..... | ..... |
| 06F_46.ab1 | .....                                                                    | ..... | ..... | ..... | ..... | ..... | ..... |
| 06G_47.ab1 | .....                                                                    | ..... | ..... | ..... | ..... | ..... | ..... |
| 06H_48.ab1 | .....                                                                    | ..... | ..... | ..... | ..... | ..... | ..... |
| 07A_49.ab1 | .....                                                                    | ..... | ..... | ..... | ..... | ..... | ..... |
| 07B_50.ab1 | .....                                                                    | ..... | ..... | ..... | ..... | ..... | ..... |
| 07C_51.ab1 | .....                                                                    | ..... | ..... | ..... | ..... | ..... | ..... |

|            |                                                                      |       |       |       |       |       |       |
|------------|----------------------------------------------------------------------|-------|-------|-------|-------|-------|-------|
|            | 640                                                                  | 650   | 660   | 670   | 680   | 690   | 700   |
| ZsGreen1   | .... .... .... .... .... .... .... .... .... .... .... .... ....     |       |       |       |       |       |       |
|            | CGACGCCAAGAACCAAGATGGCACCTGACCGAGCACGCCATCGCCTCCGGCTCCGCTTGCCCCATCAT |       |       |       |       |       |       |
| 04B_26.ab1 | .....                                                                | ..... | ..... | ..... | ..... | ..... | ..... |
| 04C_27.ab1 | .....                                                                | ..... | ..... | ..... | ..... | ..... | ..... |
| 04D_28.ab1 | .....                                                                | ..... | ..... | ..... | ..... | ..... | ..... |
| 04E_29.ab1 | .....                                                                | ..... | ..... | ..... | ..... | ..... | ..... |
| 04F_30.ab1 | .....                                                                | ..... | ..... | ..... | ..... | ..... | ..... |
| 04G_31.ab1 | .....                                                                | ..... | ..... | ..... | ..... | ..... | ..... |
| 04H_32.ab1 | .....                                                                | ..... | ..... | ..... | ..... | ..... | ..... |
| 05A_33.ab1 | .....                                                                | ..... | ..... | ..... | ..... | ..... | ..... |
| 05B_34.ab1 | .....                                                                | ..... | ..... | ..... | ..... | ..... | ..... |
| 05C_35.ab1 | .....                                                                | ..... | ..... | ..... | ..... | ..... | ..... |
| 05D_36.ab1 | .....                                                                | ..... | ..... | ..... | ..... | ..... | ..... |
| 05E_37.ab1 | .....                                                                | ..... | ..... | ..... | ..... | ..... | ..... |
| 05F_38.ab1 | .....                                                                | ..... | ..... | ..... | ..... | ..... | ..... |
| 05G_39.ab1 | .....                                                                | ..... | ..... | ..... | ..... | ..... | ..... |
| 05H_40.ab1 | .....                                                                | ..... | ..... | ..... | ..... | ..... | ..... |
| 06A_41.ab1 | .....                                                                | ..... | ..... | ..... | ..... | ..... | ..... |
| 06B_42.ab1 | .....                                                                | ..... | ..... | ..... | ..... | ..... | ..... |
| 06C_43.ab1 | .....                                                                | ..... | ..... | ..... | ..... | ..... | ..... |
| 06D_44.ab1 | .....                                                                | ..... | ..... | ..... | ..... | ..... | ..... |
| 06E_45.ab1 | .....                                                                | ..... | ..... | ..... | ..... | ..... | ..... |
| 06F_46.ab1 | .....                                                                | ..... | ..... | ..... | ..... | ..... | ..... |
| 06G_47.ab1 | .....                                                                | ..... | ..... | ..... | ..... | ..... | ..... |
| 06H_48.ab1 | .....                                                                | ..... | ..... | ..... | ..... | ..... | ..... |
| 07A_49.ab1 | .....                                                                | ..... | ..... | ..... | ..... | ..... | ..... |
| 07B_50.ab1 | .....                                                                | ..... | ..... | ..... | ..... | ..... | ..... |
| 07C_51.ab1 | .....                                                                | ..... | ..... | ..... | ..... | ..... | ..... |

710

|            | ..... ..... ..... ..              |
|------------|-----------------------------------|
| ZsGreen1   | CACCA-TCACCAC-TAG                 |
| 04B_26.ab1 | .....~.....~.....~.....           |
| 04C_27.ab1 | .....~ <b>A</b> .....~.....~..... |
| 04D_28.ab1 | .....~.....~.....~.....           |
| 04E_29.ab1 | .....~.....~.....~.....           |
| 04F_30.ab1 | .....~.....~.....~.....           |
| 04G_31.ab1 | .....~.....~.....~.....           |
| 04H_32.ab1 | .....~.....~.....~.....           |
| 05A_33.ab1 | .....~.....~.....~ <b>T</b> ..... |
| 05B_34.ab1 | .....~.....~.....~.....           |
| 05C_35.ab1 | .....~.....~.....~.....           |
| 05D_36.ab1 | .....~.....~.....~.....           |
| 05E_37.ab1 | .....~.....~.....~.....           |
| 05F_38.ab1 | .....~.....~.....~.....           |
| 05G_39.ab1 | .....~.....~.....~.....           |
| 05H_40.ab1 | .....~.....~.....~.....           |
| 06A_41.ab1 | .....~.....~.....~.....           |
| 06B_42.ab1 | .....~.....~.....~.....           |
| 06C_43.ab1 | .....~.....~.....~.....           |
| 06D_44.ab1 | .....~.....~.....~.....           |
| 06E_45.ab1 | .....~.....~.....~.....           |
| 06F_46.ab1 | .....~.....~.....~.....           |
| 06G_47.ab1 | .....~.....~.....~.....           |
| 06H_48.ab1 | .....~.....~.....~.....           |
| 07A_49.ab1 | .....~.....~.....~.....           |
| 07B_50.ab1 | .....~.....~.....~.....           |
| 07C_51.ab1 | .....~.....~.....~.....           |

## References:

- [1] B. L. Nilsson, M. B. Soellner, R. T. Raines, *Annu. Rev. Biophys. Biomolec. Struct.* **2005**, *34*, 91-118.
- [2] K. Itakura, T. Hirose, R. Crea, A. D. Riggs, H. L. Heyneker, F. Bolivar, H. W. Boyer, *Science* **1977**, *198*, 1056-1063.
- [3] W. P. Stemmer, A. Cramer, K. D. Ha, T. M. Brennan, H. L. Heyneker, *Gene* **1995**, *164*, 49-53.
- [4] M. Kozak, *Nucleic Acids Res* **1987**, *15*, 8125-8148.
- [5] J. F. Milligan, D. R. Groebe, G. W. Witherell, O. C. Uhlenbeck, *Nucleic Acids Res* **1987**, *15*, 8783-8798.
- [6] C. T. Martin, D. K. Muller, J. E. Coleman, *Biochemistry* **1988**, *27*, 3966-3974.
- [7] Z. Guo, R. A. Guilfoyle, A. J. Thiel, R. F. Wang, L. M. Smith, *Nucleic Acids Res* **1994**, *22*, 5456-5465.
- [8] a) S. Singh-Gasson, R. D. Green, Y. J. Yue, C. Nelson, F. Blattner, M. R. Sussman, F. Cerrina, *Nat. Biotechnol.* **1999**, *17*, 974-978; b) M. F. Phillips, M. R. Lockett, M. J. Rodesch, M. R. Shortreed, F. Cerrina, L. M. Smith, *Nucleic Acids Res* **2008**, *36*, e7.
- [9] a) M. R. Lockett, L. M. Smith, *Anal Chem* **2009**, *81*, 6429-6437; b) M. R. Lockett, S. C. Weibel, M. F. Phillips, M. R. Shortreed, B. Sun, R. M. Corn, R. J. Hamers, F. Cerrina, L. M. Smith, *Journal of the American Chemical Society* **2008**, *130*, 8611-8613.
- [10] J. F. Milligan, O. C. Uhlenbeck, *Methods in Enzymology* **1989**, *180*, 51-62.
- [11] a) K. E. Richmond, M. H. Li, M. J. Rodesch, M. Patel, A. M. Lowe, C. Kim, L. L. Chu, N. Venkataramaian, S. F. Flickinger, J. Kaysen, P. J. Belshaw, M. R. Sussman, F. Cerrina, *Nucleic Acids Res* **2004**, *32*, 5011-5018; b) J. D. Tian, H. Gong, N. J. Sheng, X. C. Zhou, E. Gulari, X. L. Gao, G. Church, *Nature* **2004**, *432*, 1050-1054; c) A. S. Xiong, Q. H. Yao, R. H. Peng, X. Li, H. Q. Fan, Z. M. Cheng, Y. Li, *Nucleic Acids Res* **2004**, *32*, e98; d) C. Kim, J. Kaysen, K. Richmond, M. Rodesch, B. Binkowski, L. Chu, M. Li, K. Heinrich, S. Blair, P. Belshaw, M. Sussman, F. Cerrina, *Microelectron. Eng.* **2006**, *83*, 1613-1616; e) S. Kosuri, N. Eroshenko, E. M. LeProust, M. Super, J. Way, J. B. Li, G. M. Church, *Nat. Biotechnol.* **2010**, *28*, 1295-U1108; f) M. Matzas, P. F. Stahler, N. Kefer, N. Siebelt, V. Boisguerin, J. T. Leonard, A. Keller, C. F. Stahler, P. Haberle, B. Gharizadeh, F. Babrzadeh, G. M. Church, *Nat. Biotechnol.* **2010**, *28*, 1291-U1101.
- [12] E. Hochuli, W. Bannwarth, H. Dobeli, R. Gentz, D. Stuber, *Bio-Technol* **1988**, *6*, 1321-1325.
- [13] a) J. Y. Quan, I. Saaem, N. Tang, S. M. Ma, N. Negre, H. Gong, K. P. White, J. D. Tian, *Nat. Biotechnol.* **2011**, *29*, 449-U239; b) A. Y. Borovkov, A. V. Loskutov, M. D. Robida, K. M. Day, J. A. Cano, T. Le Olson, H. Patel, K. Brown, P. D. Hunter, K. F. Sykes, *Nucleic Acids Res* **2010**, *38*, e180.
- [14] A. S. Xiong, R. H. Peng, J. Zhuang, J. G. Liu, F. Gao, J. M. Chen, Z. M. Cheng, Q. H. Yao, *Biotechnol. Adv.* **2008**, *26*, 121-134.
- [15] M. A. Cleary, K. Kilian, Y. Q. Wang, J. Bradshaw, G. Cavet, W. Ge, A. Kulkarni, P. J. Paddison, K. Chang, N. Sheth, E. Leproust, E. M. Coffey, J. Burchard, W. R. McCombie, P. Linsley, G. J. Hannon, *Nat. Methods* **2004**, *1*, 241-248.
- [16] a) X. Gao, B. L. Gaffney, M. Senior, R. R. Riddle, R. A. Jones, *Nucleic Acids Res* **1985**, *13*, 573-584; b) R. T. Pon, M. J. Damha, K. K. Ogilvie, *Nucleic Acids Res* **1985**, *13*, 6447-6465; c) R. T. Pon, N. Usman, M. J. Damha, K. K. Ogilvie, *Nucleic Acids Res* **1986**, *14*, 6453-6470; d) S. Crippa, P. Digennaro, R. Lucini, M. Orlandi, B. Rindone, *Gazzetta Chimica Italiana* **1993**, *123*, 197-203.
- [17] All of the RNA segments employed for the assembly of ZsGreen1 have higher Gibbs free energy (less stable) for secondary structure folding than for hybridization to their complementary splints.
- [18] K. L. Prime, G. M. Whitesides, *Journal of the American Chemical Society* **1993**, *115*, 10714-10721.
- [19] A. C. Pease, D. Solas, E. J. Sullivan, M. T. Cronin, C. P. Holmes, S. P. A. Fodor, *P Natl Acad Sci USA* **1994**, *91*, 5022-5026.
- [20] G. H. McGall, A. D. Barone, M. Diggelmann, S. P. A. Fodor, E. Gentalen, N. Ngo, *J Am Chem Soc* **1997**, *119*, 5081-5090.
- [21] S. Walbert, W. Pfeleiderer, U. E. Steiner, *Helvetica Chimica Acta* **2001**, *84*, 1601-1611.
